# Supplementary material for: Variations of Arctic winter ozone from the LIMS Level 3 dataset
Source: Copernicus journal article supplement (doi:10.5194/amt-2021-340), 2021-11-09
Supplement: Supplementary file [file amt-2021-340-AC2-supplement.pdf]

Reply to Referee #2 (*in italics*)

Report for manuscript AMT-2021-340 on “Variations of Arctic winter ozone from the LIMS Level 3 dataset” by Remsberg et al.

General comments:

I understand that the major focus of the paper is to demonstrate “the value and use” of the LIMS V6 Level 3 data of the arctic winter 1978-1979. In doing so the authors try to show that some O3 phenomena and characteristics, found in posterior analysis of more recent (and some more complete) datasets, are also present in the LIMS V6 L3 dataset (a clear example of this is Sec. 5).

From the point of view of science, I see no aspect which is really new. On the other hand, to show that some O3 features are also present in LIMS data is useful, as this is an independent dataset. Hence, although I cannot see any major scientific contribution I cannot see any either strong reason for not publishing it -the manuscript is very well written-. It is a shame that some of these phenomena have not been published before using LIMS data.

One possibility to enhance the manuscript value would be to compare more quantitatively the variations/characteristics found in LIMS with previous studies. This will be more useful for readers, instead of just showing “... some LIMS examples of the larger-scale variations of Arctic ozone, temperature, and GPH”.

On another note, I am not fully convinced that this paper falls completely in the AMT scope. The main aim of the manuscript is not to present the LIMS L3 dataset, which it seems has been published before (Remsberg et al., AMT, 2021; Remsberg et al., 2011; Remsberg and Lingenfelser, 2010), but some O3 phenomenology.

*General comments: Thank you for your thorough review and for adding some references. We originally submitted our manuscript to Earth System Science Data (ESSD) journal, but it did not attract an associate editor after a wait of more two months. We believe that AMT is an appropriate alternate venue. In the revised text, original Fig. 8 is moved to Supplemental materials as Fig. S1 to achieve better continuity of the subject matter in the manuscript. The maps of GPH are now Figure 8. We relate the late January/early February LOP feature to that in Morris et al. In Figure 9 we now show two maps of NO<sub>2</sub>—at 4.6 hPa and at 3.2 hPa—to indicate that there may be downward transport of NO<sub>2</sub> from 3.2 hPa to 4.6 hPa in the region of the LOP. Fig. 9 also shows a relative increase in HNO<sub>3</sub> at 4.6 hPa in that region. The three ozone maps in original Fig. 10 are retained in new Fig. 10.*

*LIMS provides high northern latitude measurements throughout winter, unlike SABER. The stratopause from LIMS V6 zonal mean temperatures is near 55 km at 70-84N for November and December 1978 but then shifts back to just below 50 km for January and February 1979. In that respect, the LIMS winter of 1978-79 appears normal, compared with the several anomalous winters reported in Smith et al. (2009). Our study of the tertiary ozone maximum is possible with V6 because its ozone profiles extend to the upper mesosphere. Zonal mean ozone has a tertiary maximum at about 0.022 hPa (~73 km). Fig. 11 shows maps that indicate the zonal variability of temperature and the tertiary ozone feature at 0.022hPa for December 15. New Figure 12 is a time series of the peak ozone and its latitude location for one day of each week from November through mid-March. Peak zonal mean ozone occurs in early February, which differs somewhat from that of other datasets. Maps of ozone and temperature for three other days that winter are in the Supplementary material (Figs. S2 and S3); the structure and continuity of the temperature features appear related to an advection process, as opposed to uncorrected NLTE effects.*

*We also include Fig. S4 (in Supplementary materials), comparing the map of V6 ozone for January 27 at 10 hPa, based on the mapping of the V6 profiles, versus that shown in Leovy et al. (1985) from an earlier LIMS map version. V6 displays tighter ozone gradients along its subtropical boundary, primarily because the SE mapping algorithm for V6 has a short memory (or relaxation time) of before and after January 27.*

Minor/moderate comments:

*We agree with your editorial suggestions and have made corrections or added a reference, where needed. We comment on several of your specific concerns/questions below.*

P2, L27-28, I do not understand this sentence. V6 are satellite measurements. Hence, I do not understand why "V6 satellite data" "are important for interpreting satellite limb infrared measurements versus local measurements." Maybe the authors want to say that LIMS V6 are important for interpreting other (non-satellite) "local" measurements?

*We altered the sentence to read—"We illustrate how the synoptic maps of V6 ozone and temperature are an important aid..."*

P2, L41, For many readers the middle atmosphere includes the mesosphere. This sentence should be re-written. Something like: "Ozone is an excellent tracer of the stratosphere (or lower stratosphere)".

P3, L52, I suggest adding also the SABER observations (Smith et al. GRL, 2009).

P5, L115-116, LIMS V6 free of non-LTE below ~0.05 hPa. This is true for most conditions except in the polar winter regions, (or during strat-warm) where it is expected to be significant (see, Fig. 22d in Funke et al., 2012).

*We now cite the NLTE study of Funke et al. (2012) here and at Line 141. Thank you for pointing it out.*

P6, L141-142, see comment above. The data might be affected by NLTE even at night.

P6, L147-148, “A tertiary ozone maximum is present in the upper mesosphere near the day/night terminator zones of the LIMS measurements for January (~50°S ...”. This seems very interesting. However, such a tertiary maximum is not present in MIPAS measurements in January in the Southern hemisphere (e.g. ~50°S) (see Fig. 12 in Lopez-Puertas et al., 2018). It is not present either in the Southern hemisphere winter, e.g. July near 50°N. Also, I have not seen this kind of enhancement in other O3 datasets. Those conditions are polar summer. Should we expect a tertiary maximum in summer conditions? Could the authors check this behaviour. If it is found to be real it would be very useful to comment in the manuscript about the reasons for the maximum in those regions.

*The inclusion of 50S in line 148 was a misstatement, and we are deleting it. The rapid change with latitude near 50S is because LIMS was viewing across the night/day terminator in January, as you note in your comment about P6, L154.*

P6, L150, “The location (~0.02 hPa) and magnitude (~3.5 ppmv) of the NH maximum agree with those reported from subsequent satellite studies by Smith et al.” I would probably say slightly larger: MIPAS values are always below ~2.5 ppmv (Smith et al., 2018, Fig. 4 and Lopez-Puertas et al., 2018, Fig. 12).

*Peak, zonal mean (A+D) ozone values in new Fig. 12 range from 2.2 ppmv on November 8 at 66°N to 3.7 ppmv on February 14 at 80°N and on February 28 at 76°N. Peak V6 nighttime ozone values are larger but also more variable. Those LIMS values are larger than ones from MIPAS and from AURA-MLS.*

P6, L154, “Thus, the decrease of mesospheric V6 ozone at 0.1 hPa and poleward of 60°S in Fig. 1 indicates merely a change from night to day values”. That is correct. The diurnal variation of O3 is clearly seen, for example, in Figs. 11, 12 and 13 of Lopez-Puertas et al., 2018.

P8, L199-200. Could the authors comment on the differences in local time between the rocket O3 measurements and the satellite measurements? They could lead to significant differences in O3 (see, e.g. Studer et al., 2014, Figs. 4a).

*Observed diurnal differences in ozone are smaller than the differences between V6 and rocket at White Sands in Fig. 4. We now include the time difference (~half an hour) along with the latitude coordinates of the V6 and rocket soundings. Most likely the measurements are not exactly co-located (limb path versus a local sounding) and/or there were inadequate gradient corrections for the V6 profiles.*

P8, L205. Which is the meaning of the asterisk?

*The asterisk refers to the Datasonde profile in caption of Fig.5.*

P8, L211-212. I do not understand this point. Temperature differences between datasonde and V6 at ~0.5-1 hPa are significant, close to 10K, but O3 compares well. How can this be explained?

*You raise a good point. The map shows that there is a strong gradient in temperature above White Sands, and separate maps (not shown) from the descending versus the ascending orbital scans indicate differences of ~5K at that spot, an indication of not having corrections for  $T(p)$  gradients for V6 in the mesosphere. Yet, ozone compares well at 0.68 hPa, as you say. One possible explanation is that the correlative ozone and temperature measurements are from separate instruments on different rocket soundings—there may be a co-location issue between them. Results of this kind indicate how difficult it is to obtain good correlative comparisons during disturbed atmospheric situations.*

P9, L232-233. I do not fully understand the aim of this sentence. Is it that “V6 ozone has very little bias due to temperature” (the temperature measured by LIMS I guess)? I believe this has been verified before, in validation studies. Otherwise, I think the authors should not reach this important conclusion from just comparing a few profiles which, btw, differ by more than 5 K.

*The sentence will be revised. According to the bias estimates in Remsberg et al. (2021, their Table 1), retrieved V6 ozone in Fig. 6 should be affected significantly by the temperature differences in Fig. 7 (i.e., a +5K bias would impart a nearly -40% ozone error at 3 hPa). The observed smaller ozone differences between V6 and sonde may again be due to co-location differences between the separate rocket ozone and temperature soundings in this disturbed atmospheric region and/or to the spatial differences of the V6 tangent layer versus in situ measurements.*

P10, L263-264. Are the authors suggesting that LIMS data would be useful to study LOPs in the mesosphere? I think it is not the case. O3 should not be considered a good tracer in the mesosphere.

*Your concern is valid, and we no longer describe ozone as a tracer for the LOP in the lower mesosphere.*

P11, L287-288. It seems to me rather descriptive and a bit speculative. To confirm this would require a quantitative analysis. Further, this contrasts with the idea mentioned above that O3 can be considered as a good tracer in the mid-stratospheric arctic region.

*Revised Fig. 9 now contains two plots of nighttime NO<sub>2</sub> only, one at 4.6 hPa, as before, and another at 3.2 hPa showing equivalent values of NO<sub>2</sub> in the small region of the LOP and indicating possible descent and consequent loss of ozone due to chemical processes. We added a plot of HNO<sub>3</sub> to Fig. 9, and it is also elevated in the region of the LOP at 4.6 hPa. This is an indication of chemical conversion of NO<sub>2</sub> to HNO<sub>3</sub> at the center of the anticyclone.*

P12, L312. It would be useful to draw the terminator in the upper panels of Fig. 11.

*We now include the latitude of Poker Flat (red dot at 65°N) as a reference location, and we show the position of the terminator in new Fig. 12 (see following response also).*

P12, L312-313. Can the behaviour shown, derived from two single days in different months, be considered as representative of the tendency along the winter? E.g. an increase of the O3 tertiary maximum as the winter progresses? MIPAS O3 shows no clear tendency and it varies from year to year (see Fig. 15, bottom/right panel of Lopez-Puertas et al., 2018). Also, the data reported by Smith et al. (2018) shows that the O3 tertiary maximum decreases in Feb (see their Fig. 3, right panels).

*New Figure 12 is a time series of peak ozone and its latitude location at 0.022 hPa. The position of the terminator is noted, as well, and it shifts toward higher latitudes away from winter solstice. Peak zonal mean values increase slowly from a minimum of 2.2 ppmv in November, to ~3.1 ppmv in January, to a maximum of 3.7 ppmv in February, and then declining to 3.0 ppmv by mid-March. The enhanced values in February follow the minor SSW of late January and the final SSW event of mid to late February.*

P12, L329-330. About the sentence “Although the seasonal evolution of the tertiary ozone maximum is understood reasonably well (Smith et al., 2018), there is more information about this ozone feature from the daily maps of ozone, T(p), and GPH from Level 3.”, Could the authors clarify which “more information” is in LIMS data which is not available from later sensors (e.g. SABER, MIPAS, GOMOS, ACE, etc.) that also measures O3 globally, over longer time scales, with more extended altitude ranges and with better sensitivity (see, e.g., Smith et al. 2013). Many of those instruments also measured daily maps. I understand “more information” in the sense that it provides very important measurements taken more than two decades before, in the winter of 1978-1979, but not in the other respects.

*We modified the sentence as “one can gain more information...from the daily maps...”. Certainly, there is also more information from the more recent satellite datasets.*

Some suggestions for the figures and figures captions:

Fig. 1. What are the conditions for lat. >55°S? Only daytime?

*Yes, in daylight.*

Fig. 3. Zonal “mean”? Maybe the caption could be made more explicitly, as in the text.

*Should be “zonal standard deviations about the average (A+D) zonal mean...”*

Fig. 4. I suggest specifying the illuminations conditions (day? night? local solar time of the CHEM sonde?). Also, please add the text included in the caption of Fig. 5 ( “where the short-dashed curve is for 29.2° and the long-dashed curve is for 37.2°”).

Fig. 5. Why use a different pressure level for the temperature map than for O3 in Fig. 4?

*We want to show what the temperature field looked like, where there is a discrepancy in  $T(p)$  between the V6 and Datasonde profiles.*

Fig. 6. Please add the sentence about the altitudes as in Fig. 4: (“Latitudes (dotted circles) are spaced every 10°.”).

Fig. 7, top panel. Improve contrast, make axis lines and marks thicker.

*The .jpeg figure is clear, but it was degraded in the .pdf manuscript. We will check that it looks OK for the published manuscript.*

Fig. 12. Is O3 for daytime? nighttime? both?

*Original Fig. 12 is now Fig. 13. Its ozone is from the combined (or A+D) orbital profile data.*

## References

- Funke, B., López-Puertas, M., García-Comas, M., Kaufmann, M., Höpfner, M., and Stiller, G. P.: GRANADA: a generic RAdiative traNsfer AnD non-LTE population algorithm, *J. Quant. Spectros. Radiat. Transfer*, 113, 1771–1817, <https://doi.org/doi: 10.1016/j.jqsrt.2012.05.001>, 2012.
- López-Puertas, M., García-Comas, M., Funke, B., Gardini, A., Stiller, G. P., Clarmann, T. von, Glatthor, N., Laeng, A., Kaufmann, M., Sofieva, V. F., Froidevaux, L., Walker, K. A., and Shiotani, M.: MIPAS observations of ozone in the middle atmosphere, *Atmos. Meas. Tech.*, 11, 2187–2212, <https://doi.org/10.5194/amt-11-2187-2018>, 2018.
- Smith, A. K., López-Puertas, M., García-Comas, M., and Tukiainen, S.: SABER observations of mesospheric ozone during NH late winter 2002–2009, 36, L23804, <https://doi.org/10.1029/2009GL040942>, 2009.
- Smith, A. K., Harvey, V. L., Mlynczak, M. G., Funke, B., Garcia-Comas, M., Hervig, M., Kaufmann, M., Kyrölä, E., López-Puertas, M., McDade, I., Randall, C. E., Russell III, J. M., Sheese, P. E., Shiotani, M., Skinner, W. R., Suzuki, M., and Walker, K. A.: Satellite observations of ozone in the upper mesosphere, *Journal of Geophysical Research*, 118, 5803–5821, <https://doi.org/10.1002/jgrd.50445>, 2013.

Studer, S., Hocke, K., Schanz, A., Schmidt, H., and Kämpfer, N.: A climatology of the diurnal variations in stratospheric and mesospheric ozone over Bern, Switzerland, *Atmos. Chem. Phys.*, 14, 5905–5919, <https://doi.org/10.5194/acp-14-5905-2014>, 2014.

*We now cite the first three references, but not last two. Smith et al. (2013) does not characterize the tertiary ozone feature. Studer et al. (2014) report on diurnal variations in ozone, but the V6 and rocket ozone profiles in Fig. 4 are separated by only half an hour.*

Figures--

Below we show new Figure 12. We also show the second NO<sub>2</sub> panel (for 3.2 hPa) and an HNO<sub>3</sub> panel at 4.6 hPa for revised Figure 9. Fig. S4 of the Supplemental Materials compares V6 ozone for January 27 at 10 hPa with a similar map from Leovy et al. (1985).

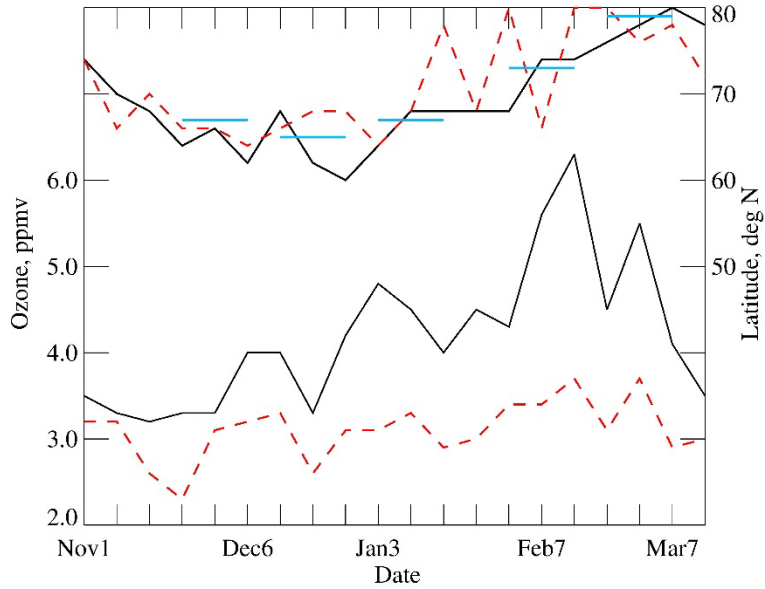

New Figure 12--Time series of peak V6 daily ozone at 0.022 hPa and its latitude location, plotted at every 7 days.

The time series are for peak ozone (bottom two) and their latitude locations (top two). Dashed red curves represent zonal mean results for the combined (A+D) data; solid black curves are results for nighttime (D) only. Blue horizontal lines represent latitude position of the terminator at 30 km altitude.



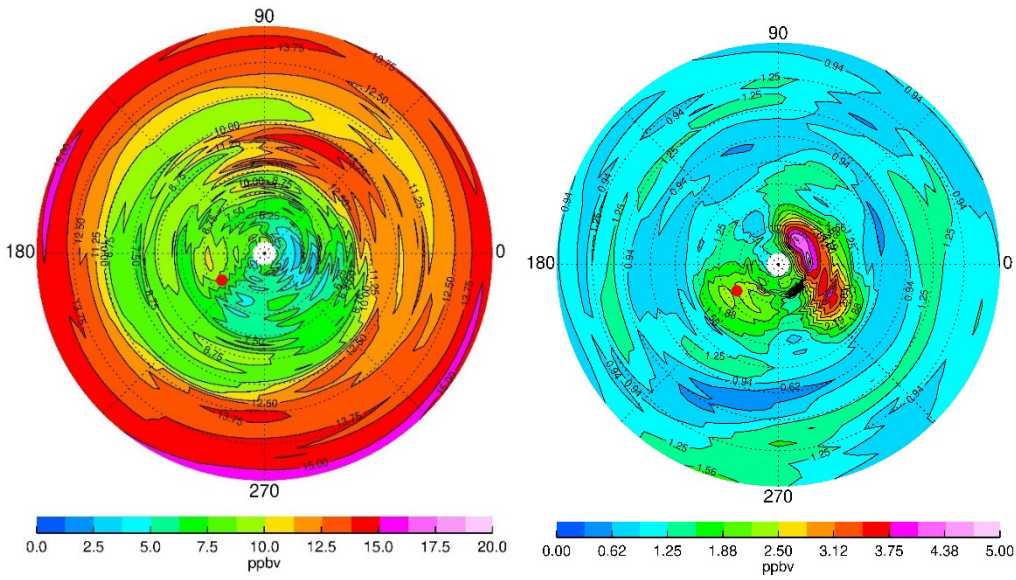

Figure 9—Additional panels (at left) of NO<sub>2</sub> at 3.2 hPa and (at right) of HNO<sub>3</sub> at 4.6 hPa on January 27.

New figure for Supplemental Materials--

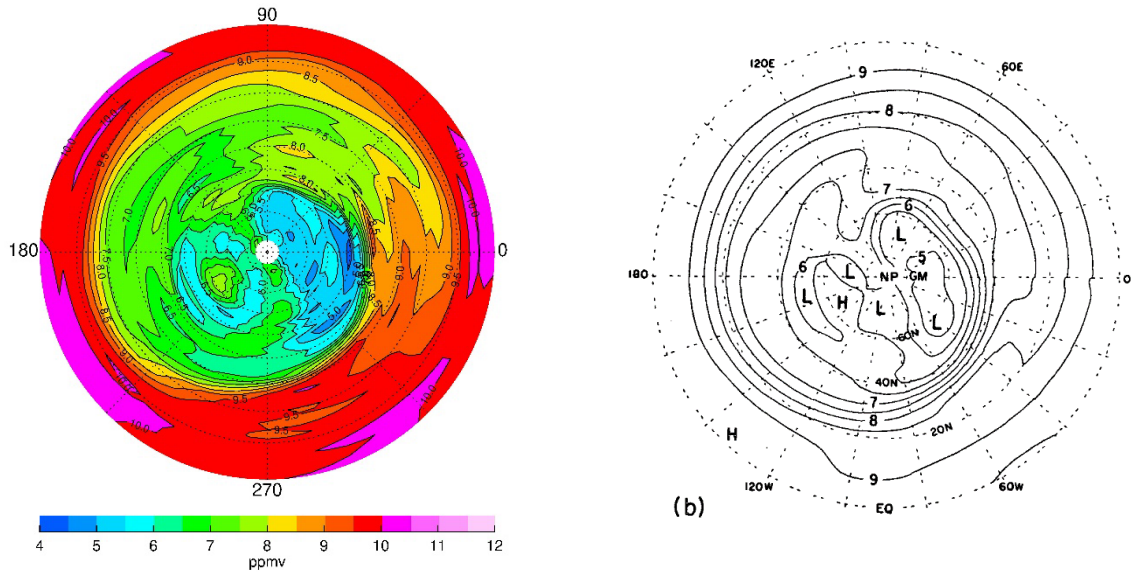

Fig. S4—Comparison of ozone at 10 hPa for 27 January from (left) V6 versus (right) Leovy et al. (1985).
